# Supplementary material
Source: publisher site journal article supplement (https://www.dovepress.com/article/281705)
Supplement: Supplementary file 1 [file get_supplementary_file.php]

**SUPPLEMENTAL DATA**

**Supplementary Table 1** The clinical characteristics of patients with plaque with or without diabetes.

| No. | Type | Disease state | Sex | Age | Cva / tia |
| --- | --- | --- | --- | --- | --- |
| Diabetic_1 | Diabetic plaque macrophage | Diabetic | F | 43 | Asymptomatic |
| Diabetic_3 | Diabetic plaque macrophage | Diabetic | M | 64 | Asymptomatic |
| Diabetic_5 | Diabetic plaque macrophage | Diabetic | M | 67 | Asymptomatic |
| Diabetic_6 | Diabetic plaque macrophage | Diabetic | M | 67 | Asymptomatic |
| Diabetic_7 | Diabetic plaque macrophage | Diabetic | M | 69 | Asymptomatic |
| Diabetic_8 | Diabetic plaque macrophage | Diabetic | M | 49 | Asymptomatic |
| Control_2 | Control plaque macrophage | Control | M | 62 | Asymptomatic |
| Control_3 | Control plaque macrophage | Control | M | 65 | Asymptomatic |
| Control_4 | Control plaque macrophage | Control | M | 65 | Asymptomatic |
| Control_10 | Control plaque macrophage | Control | F | 89 | Asymptomatic |
| Control_15 | Control plaque macrophage | Control | M | 60 | Asymptomatic |
| Control_16 | Control plaque macrophage | Control | M | 65 | Asymptomatic |


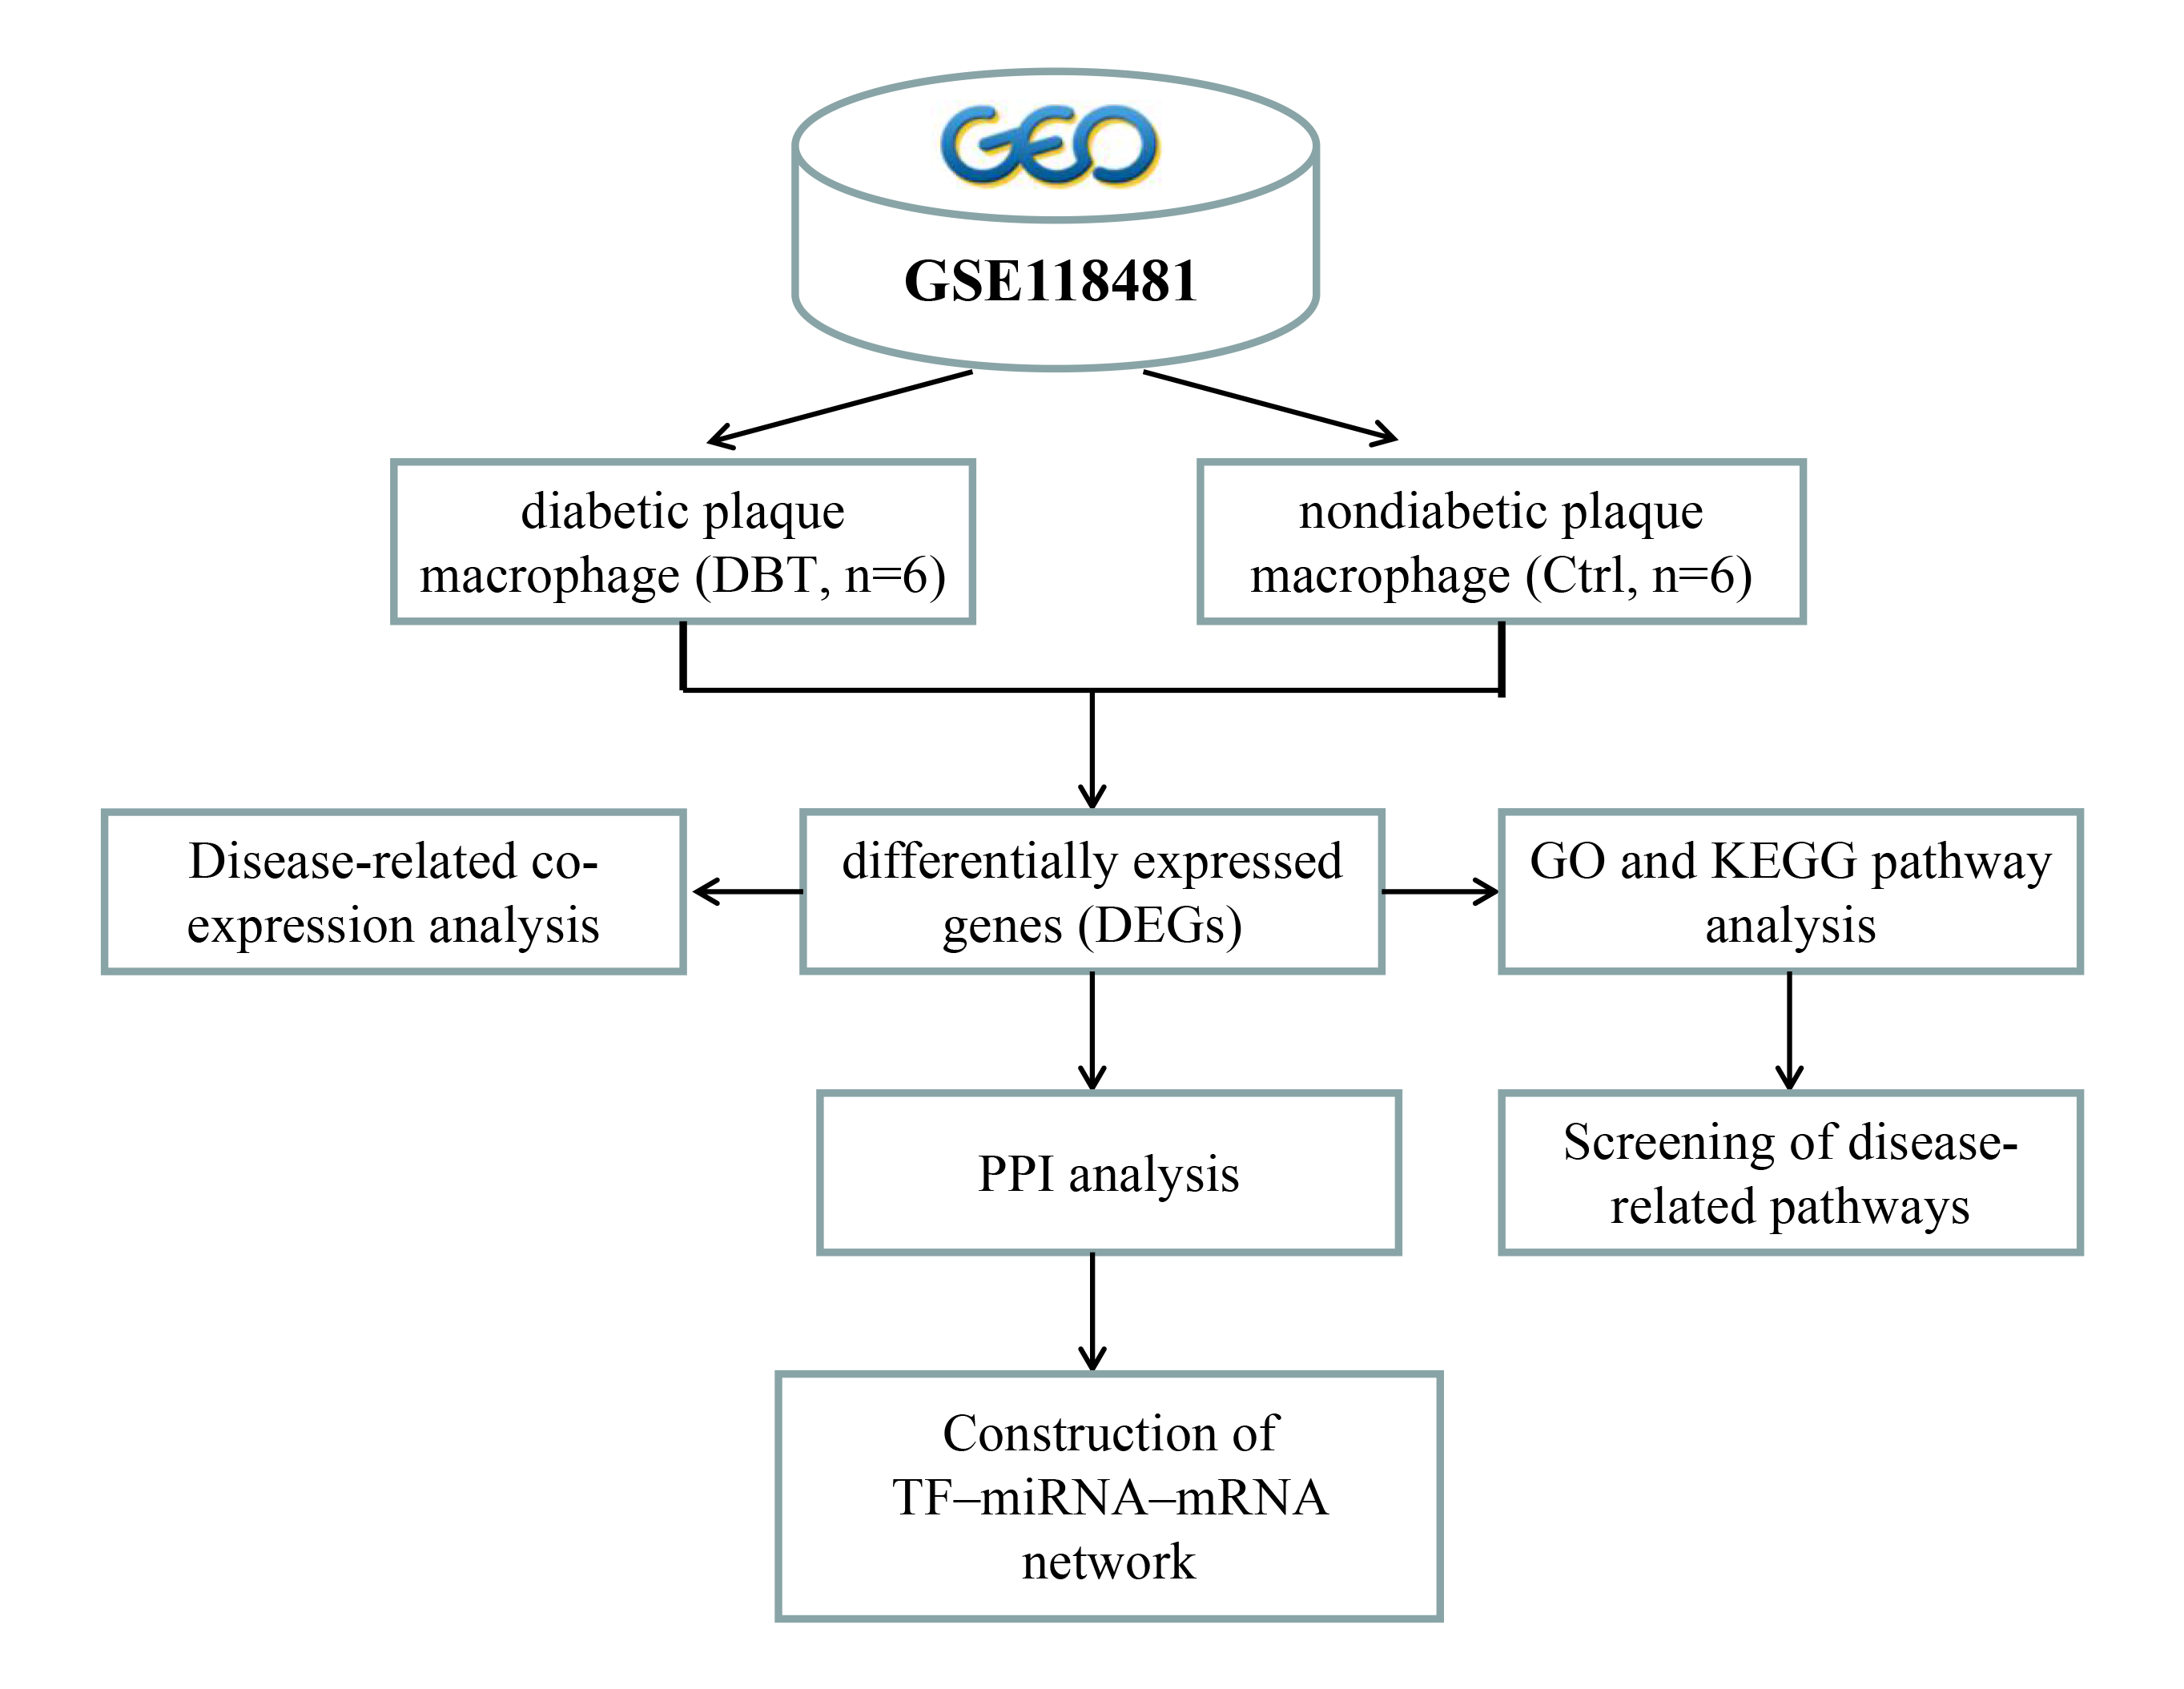


**Supplementary Figure 1**. A flow chart of the analysis regarding GSE118481.
